# Supplementary material
Source: HighWire-hosted journal article supplement (https://bmjopen.bmj.com/content/12/6/e058962)
Supplement: inline-supplementary-material-1 [file inline-supplementary-material-1.pdf]

## Supplementary file

**Supplementary Table 1: List of significant variables retained in principal component analysis (PCA) for constructing household wealth index, PNGIMR's CHESS 2018-2020**

| Number                         | Variable name                                 | Extraction | Component 1 |
|--------------------------------|-----------------------------------------------|------------|-------------|
| <b>Water and sanitation</b>    |                                               |            |             |
| 1                              | Main source of water for drinking             | 0.827      | 0.315       |
| 2                              | Main source of water for cooking              | 0.887      | 0.333       |
| 3                              | Water source location                         | 0.739      | -0.176      |
| 4                              | Kind of toilet facility                       | 0.834      | 0.13        |
| 5                              | Shared/ non shared toilet facility            | 0.744      | -0.01       |
| 6                              | Public / household shared toilet facilities   | 0.661      | 0.047       |
| <b>Hand washing</b>            |                                               |            |             |
| 7                              | Facility for washing hands                    | 0.713      | -0.055      |
| 8                              | Available water for hand washing              | 0.737      | -0.029      |
| 9                              | Available soap or detergent for washing hands | 0.852      | -0.383      |
| 10                             | Bar soap available                            | 0.844      | 0.404       |
| 11                             | Detergent (Powder / Liquid / Paste) available | 0.751      | 0.015       |
| 12                             | Liquid soap Available                         | 0.756      | 0.282       |
| 13                             | Ash / Mud / Sand available                    | 0.852      | 0.303       |
| 14                             | None above available                          | 0.591      | -0.086      |
| <b>Housing characteristics</b> |                                               |            |             |
| 15                             | Type of house                                 | 0.955      | 0.206       |
| 16                             | Number of room in house                       | 0.848      | -0.095      |
| 17                             | Number of sleeping room                       | 0.835      | -0.109      |
| 18                             | Wall materials                                | 0.846      | 0.117       |
| 19                             | Floor materials                               | 0.766      | -0.166      |
| 20                             | Roof amterials                                | 0.889      | 0.234       |
| 21                             | Source of fuel for cooking                    | 0.618      | -0.015      |
| 22                             | Separate room for cooking                     | 0.79       | -0.126      |
| <b>Household assets</b>        |                                               |            |             |
| 23                             | Owned/ Not owned car/Truck                    | 0.751      | 0.083       |
| 24                             | Owned/ Not owned Cupboard                     | 0.777      | 0.245       |
| 25                             | Owned/ Not owned Motorcycle                   | 0.768      | 0.035       |
| 26                             | Owned/ Not owned Bicycle                      | 0.775      | 0.28        |
| 27                             | Owned/ Not owned Generator                    | 0.722      | 0.227       |
| 28                             | Owned/ Not owned Computer                     | 0.796      | 0.213       |
| 29                             | Owned/ Not owned Refrigerator                 | 0.85       | 0.075       |
| 30                             | Owned/ Not owned Freezer                      | 0.811      | 0.053       |
| 31                             | Owned/ Not owned Clock/Watch                  | 0.702      | 0.233       |
| 32                             | Owned/ Not owned Radio                        | 0.721      | 0.465       |
| 33                             | Owned/ Not owned TV                           | 0.743      | 0.334       |
| 34                             | Owned/ Not owned Fan                          | 0.834      | 0.195       |
| 35                             | Owned/ Not owned Landline phone               | 0.822      | 0.035       |

|                        |                                                                 |       |        |
|------------------------|-----------------------------------------------------------------|-------|--------|
| 36                     | Owned/ Not owned Table/chairs                                   | 0.641 | 0.294  |
| 37                     | Owned/ Not owned Canoe/boat                                     | 0.746 | -0.109 |
| 38                     | Owned/ Not owned Air-conditioner                                | 0.702 | -0.039 |
| 39                     | Owned/ Not owned Gas/elect cooker                               | 0.847 | 0.075  |
| 40                     | Owned/ Not owned Washing machine                                | 0.666 | 0.095  |
| 41                     | Owned/ Not owned Mobile phone                                   | 0.776 | 0.267  |
| 42                     | Owned/ Not owned Beds (framed)                                  | 0.831 | 0.267  |
| 43                     | Owned/ Not owned Internet connection                            | 0.641 | -0.004 |
| 44                     | Owned or rent house                                             | 0.719 | -0.029 |
| 45                     | Owned agriculture land                                          | 0.917 | -0.005 |
| 46                     | Ownership of water surface for aquaculture                      | 0.906 | -0.015 |
| 47                     | Owned livestock, farm animals                                   | 0.773 | -0.277 |
| 48                     | Ownership of BUFFALO                                            | 0.607 | -0.026 |
| 49                     | Ownership of HORSES                                             | 0.737 | 0.086  |
| 50                     | Ownership of GOATS                                              | 0.675 | 0.012  |
| 51                     | Ownership of SHEEP                                              | 0.686 | -0.03  |
| 52                     | Ownership of CHICKENS                                           | 0.768 | 0.039  |
| 53                     | Ownership of PIGS                                               | 0.777 | 0.355  |
| 54                     | Ownership of DUCKS                                              | 0.753 | -0.038 |
| 55                     | Ownership of bank account                                       | 0.876 | -0.037 |
| 56                     | English spoken in the household                                 | 0.726 | 0.203  |
| 57                     | Tok-Pisin spoken in the household                               | 0.795 | -0.102 |
| 58                     | Motu spoken in the household                                    | 0.867 | 0.109  |
| 59                     | Tokples spoken in the household                                 | 0.742 | -0.205 |
| <b>Health services</b> |                                                                 |       |        |
| 60                     | Close to health facility                                        | 0.794 | 0.306  |
| 61                     | Transportation means commonly used                              | 0.758 | 0.195  |
| 62                     | Last time used the health service                               | 0.801 | -0.032 |
| 63                     | Out-patient consultation service                                | 0.8   | -0.134 |
| 64                     | In-patient clinical, care and treatment service                 | 0.841 | 0.146  |
| 65                     | Laboratory investigation services                               | 0.777 | 0.102  |
| 66                     | Cost for health service                                         | 0.611 | -0.19  |
| 67                     | Satisfaction of health service provided                         | 0.681 | -0.284 |
| <b>Household size</b>  |                                                                 |       |        |
| 68                     | Urban-rural sector                                              | 0.815 | -0.074 |
| 69                     | Total number of ALL household members                           | 0.907 | -0.011 |
| 70                     | Total number of WOMEN aged 15-49                                | 0.754 | 0.02   |
| 71                     | Total number of CHILDREN under 5                                | 0.752 | 0.02   |
| 72                     | Total number of MEN aged 15-65                                  | 0.738 | -0.037 |
| <b>Education</b>       |                                                                 |       |        |
| 73                     | Household members aged 5-24 attended class in school year 2018  | 0.596 | -0.013 |
| 74                     | Educational level attended by household members aged 5-24 years | 0.912 | 0.06   |
| 75                     | School grades attended by household members in school year 2018 | 0.918 | 0.039  |

**Supplementary Table 2: Unadjusted and adjusted odds ratios of mortalities from TB and HIV/AIDS versus other causes of death by household sociodemographic characteristics of the deceased, binary logistic regression analysis, PNGIMR's CHES, 2018-2020**

| Socioeconomic determinant | Category | N                | %      | Unadjusted Odds Ratio <sup>b</sup>                                                                                                                                                                                                                                                                                       |       |        |         | Adjusted Odds Ratio <sup>c</sup> |       |       |         |
|---------------------------|----------|------------------|--------|--------------------------------------------------------------------------------------------------------------------------------------------------------------------------------------------------------------------------------------------------------------------------------------------------------------------------|-------|--------|---------|----------------------------------|-------|-------|---------|
|                           |          |                  |        | uOR                                                                                                                                                                                                                                                                                                                      | Lower | Upper  | P-value | aOR                              | Lower | Upper | P-value |
| Sector                    | Urban    | 226              | 34.0%  | 0.317                                                                                                                                                                                                                                                                                                                    | 0.166 | 0.606  | 0.001   | 0.149                            | 0.105 | 0.356 | 0.001   |
|                           | Rural    | 439              | 66.0%  | Ref.                                                                                                                                                                                                                                                                                                                     |       |        |         | Ref.                             |       |       |         |
| Province <sup>a</sup>     | POM      | 30               | 4.5%   | 1.013                                                                                                                                                                                                                                                                                                                    | 0.250 | 4.107  | 0.985   | 1.013                            | 0.391 | 2.313 | 0.961   |
|                           | Central  | 167              | 25.1%  | 0.698                                                                                                                                                                                                                                                                                                                    | 0.324 | 1.505  | 0.359   | 0.641                            | 0.151 | 1.447 | 0.366   |
|                           | EHP      | 277              | 41.7%  | 1.255                                                                                                                                                                                                                                                                                                                    | 0.637 | 2.473  | 0.512   | 1.227                            | 0.545 | 2.033 | 0.488   |
|                           | Madang   | 75               | 11.3%  | 2.658                                                                                                                                                                                                                                                                                                                    | 1.116 | 6.331  | 0.027   | 1.977                            | 1.078 | 3.070 | 0.032   |
|                           | ENB      | 116              | 17.4%  | Ref.                                                                                                                                                                                                                                                                                                                     |       |        |         | Ref.                             |       |       |         |
| Sex                       | Male     | 387              | 58.2%  | 0.736                                                                                                                                                                                                                                                                                                                    | 0.479 | 1.129  | 0.160   | 0.693                            | 0.229 | 1.125 | 0.165   |
|                           | Female   | 278              | 41.8%  | Ref.                                                                                                                                                                                                                                                                                                                     |       |        |         | Ref.                             |       |       |         |
| Age group (in year)       | 0-4      | 39               | 5.9%   | N/A                                                                                                                                                                                                                                                                                                                      | N/A   | N/A    | N/A     | N/A                              | N/A   | N/A   | N/A     |
|                           | 5-14     | 20               | 3.0%   | N/A                                                                                                                                                                                                                                                                                                                      | N/A   | N/A    | N/A     | N/A                              | N/A   | N/A   | N/A     |
|                           | 15-24    | 45               | 6.8%   | 3.713                                                                                                                                                                                                                                                                                                                    | 1.190 | 11.581 | 0.024   | 2.312                            | 1.008 | 3.790 | 0.020   |
|                           | 25-34    | 64               | 9.6%   | 7.820                                                                                                                                                                                                                                                                                                                    | 2.842 | 21.518 | 0.000   | 3.057                            | 2.161 | 4.514 | 0.003   |
|                           | 35-44    | 62               | 9.3%   | 7.059                                                                                                                                                                                                                                                                                                                    | 2.566 | 19.421 | 0.000   | 2.954                            | 2.020 | 4.485 | 0.003   |
|                           | 45-54    | 115              | 17.3%  | 3.230                                                                                                                                                                                                                                                                                                                    | 1.203 | 8.671  | 0.020   | 2.173                            | 1.227 | 3.574 | 0.013   |
|                           | 55-64    | 131              | 19.7%  | 3.363                                                                                                                                                                                                                                                                                                                    | 1.297 | 8.718  | 0.013   | 2.213                            | 1.252 | 3.457 | 0.015   |
|                           | 65-74    | 102              | 15.3%  | 2.257                                                                                                                                                                                                                                                                                                                    | 0.822 | 6.200  | 0.114   | 1.814                            | 0.777 | 3.175 | 0.101   |
| Household wealth          | Poorest  | 135              | 20.3%  | 1.618                                                                                                                                                                                                                                                                                                                    | 0.779 | 3.363  | 0.197   | 1.481                            | 0.756 | 2.363 | 0.195   |
|                           | Poor     | 135              | 20.3%  | 1.539                                                                                                                                                                                                                                                                                                                    | 0.736 | 3.216  | 0.252   | 1.431                            | 0.619 | 2.258 | 0.251   |
|                           | Middle   | 130              | 19.5%  | 3.232                                                                                                                                                                                                                                                                                                                    | 1.598 | 6.536  | 0.001   | 2.173                            | 1.503 | 2.985 | 0.002   |
|                           | Rich     | 130              | 19.5%  | 1.950                                                                                                                                                                                                                                                                                                                    | 0.940 | 4.043  | 0.073   | 1.668                            | 0.918 | 2.488 | 0.079   |
|                           | Richest  | 135              | 20.3%  | Ref.                                                                                                                                                                                                                                                                                                                     |       |        |         | Ref.                             |       |       |         |
| Valid                     |          | 665              | 100.0% | <sup>a</sup> No data of ESP was included in the Multivariate Logistic Regress Model.                                                                                                                                                                                                                                     |       |        |         |                                  |       |       |         |
| Missing                   |          | 261              |        | <sup>b</sup> Dependent variable was deaths from HIV/AIDS and tuberculosis. The reference category was deaths from other COD rather than these two diseases. Socioeconomic and demographic factors included in the model were urban-rural sector, province, sex and age group of the deceased and household wealth group. |       |        |         |                                  |       |       |         |
| Total                     |          | 926              |        | <sup>c</sup> Results were based on 1000 bootstrap samples.                                                                                                                                                                                                                                                               |       |        |         |                                  |       |       |         |
| Subpopulation             |          | 341 <sup>d</sup> |        | <sup>d</sup> The dependent variable had only one value observed in 271 (79.5%) subpopulations.                                                                                                                                                                                                                           |       |        |         |                                  |       |       |         |
